# Supplementary material for: Assessment of Fractional Exhaled Nitric Oxide and Lung Function Among Quarry Workers
Source: Research Square preprint supplement (doi:10.21203/rs.3.rs-7497811/v1), 2025-09-23
Supplement: Supplementary file 2 [file d0d99649f73334846ec11a11.docx]

Supplementary file 2: Translated to Malay


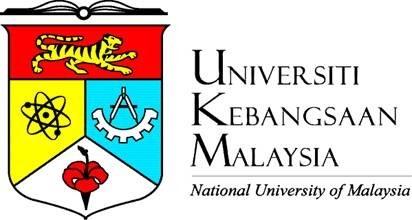


JABATAN PENYAKIT DALAM

FAKULTI PERUBATAN

UNIVERSITI KEBANGSAAN MALAYSIA

BORANG SOAL SELIDIK

Penilaian Pecahan Nitrik Oksida (FENO) dan Fungsi Paru-paru Di Kalangan Pekerja Kuari dan Hubungannya dengan Penyakit Paru-paru Pekerjaan dan Gejala Pernafasan. ___________________________________________________________________________

Nama :

No Staf :

ARAHAN SOALAN:

1. Borang soal selidik ini megandungi lim (5) bahagian iaitu :

BAHAGIAN A: MAKLUMAT DIRI

BAHAGIAN B: MAKLUMAT PEKERJAAN

BAHAGIAN C: GEJALA PERNAFASAN

BAHAGIAN D: PEMATUHAN PERALATAN PERLINDUNGAN DIRI

BAHAGIAN E: AMALAN DI TEMPAT KERJA

1. Anda diminta untuk menjawab semua soalan yang ada didalam buku ini
2. Untuk menjawab soalan, sila tandakan jawapan di bahagian jawapan yang disediakan. Borang soal selidik hendaklah dikembalikan kepada pengkaji setelah selesai menjawab soalan.

**BAHAGIAN A: MAKLUMAT DIRI**

1.1 Umur : Tahun

1.2 Tarikh Lahir : ____________(Hari/Bulan/Tahun)

1.3 Bangsa : 1. Melayu 2. Cina

3. India 4. Lain-lain: ___________

1.4 Jantina : 1. Lelaki 2. Perempuan

1.5 Status : 1. Bujang 2. Berkahwin

3. Bercerai

1.6 Pendidikan : 1. Tidak Bersekolah

2. Rendah/UPSR

3. Menengah/PMR/SPM/STPM

4. Sijil/Diploma/Ijazah

**BAHAGIAN B: MAKLUMAT PEKERJAAN**

2.1 Pernahkah anda bekerja di tempat lain sebelum ini?

1. Ya 0. Tidak

2.2 Apakah jawatan anda sekarang?

_________________________

2.3 Di bahagian manakah anda bekerja sekarang?

1. Loji SM 6. Pembikinan

2. Loji DR 7 . Refraktori

3. Kawasan Sekerap 8. Mekanikal dan Pemesinan

4. Rumah Bahan Mentah 9. Logistic dan bengkel

5. Operasi Kren 10. Elektrikal & Instrumentasi

Lain-lain: ________________________ 11. Peyampai huluan

2.4 Berapa lamakah anda telah bekerja sebagai (pekerjaan seperti di atas) ?

_______ Tahun

2.5 Berapa lamakah anda telah bekerja di kuari/kilang ini?

_______ Tahun

2.6 Syif Kerja:

1. Normal 2. Syif

2.7 Berapa hari anda bekerja selama seminggu?

_______ Hari

2.8 Adakah anda bekerja lebih masa (OT)?

1. Ya 0. Tidak

2.9 Secara purata, berapa kerap anda terdedah pada debu dalam sehari?

1. Tiada 2. 1-2 jam sehari

3. 3-4 jam sehari 4 . 5-6 jam sehari

5. 7-8 jam sehari

**BAHAGIAN C: GEJALA PERNAFASAN**

Sila tandakan ( / ) pada kotak yand disediakan dengan betul apabila menjawab soalan

Jika anda tidak pasti jawapan berikut, sila tandakan ( / ) pada kota “TIDAK”

| **BATUK** | **YA** | **TIDAK** |
| --- | --- | --- |
| 1. Adakah batuk merupakan perkara pertama yang anda alami pada waktu pagi? 2. Adakah anda batuk pada siang hari dan waktu malam?   Jika **YA** pada **Soalan 1 atau 2**, sila ke **Soalan 3**   1. (a) Adakah anda mengalami batuk berpanjangan pada kebanyakan hari, sepanjang 3 bulan setiap tahun   (b) Adakah anda batuk pada hari-hari tertentu dalam  semingu?  (c) Jika **YA**, nyatakan hari: | 1  1  1  1 | 0  0  0  0 |
| **KAHAK** | **YA** | **TIDAK** |
| 1. Adakah Berkahak merupakan perkara pertama yang anda alami pada waktu pagi? 2. Adakah anda berkahak pada siang hari atau pada waktu malam?   Jika **YA** pada **soalan 4 ATAU 5**, sila ke **soalan 6**   1. (a) Adakah anda berkahak seprti ini pada kebanyakan hari, sepanjang 3 bulan setiap tahun?   Jika **YA,** sila ke **soalan b**  (b) Berapa lamakah anda mempunyai kahak? ____ Tahun | 1  1  1 | 0  0  0 |
| **TEMPOH BATUK DAN BERKAHAK** | **YA** | **TIDAK** |
| 1. (a) Adakah anda pernah mengalami peningkatan gejala batuk dan berkahak selama 3 bulan atau lebih dalam masa 3 tahun yang lalu?   Jika YA, terus ke soalan b  (b) Adakah anda mempunyai tanda seperti di 7(a) lebih  dari satu tempoh? | 1  1 | 0  0 |

| **KETAT DADA** | **YA** | **TIDAK** |
| --- | --- | --- |
| 1. Adakah andapernah berasa ketat dada atau kesukaran bernafas? 2. Adakah anda mengalami gejala seperti ini bersama bunyi nafas ‘wheeze’? 3. Jika **TIDAK** pada **Soalan 9**, sila ke **Soalan 11**   (a) Pada hari pertama kembali ke tempat kerja  (b) Pada hari yang lain  (c) Hanya pada hari-hari yang lain | 1  1  1  1 | 0  0  0  0 |
| **SESAK NAFAS** | **YA** | **TIDAK** |
| 1. (a) Adakah Anda mengalami kesukaran bernafas apabila berjalan dengan laju atau berjalan mendaki bukit yang rendah (mendaki)?   Jika **YA** pada **soalan 11,** sila ke **soalan seterusnya**  (b) Adakah anda mengalami nafas yang pendek apabila  berjalan dengan orang yang sama umur pada paras tanah?  (c) Adakah anda berhenti seketika untuk bernafas semasa  berjalan pada kelajuan sendiri pada paras tanah?   1. (d) Adakah sesak nafas anda lebih teruk pada hari-hari tertentu? | 1  1  1  1 | 0  0  0  0 |
| **PENYAKIT DADA** | **YA** | **TIDAK** |
| 1. (a) Adakah anda menghidapi sebarang penyakit dada sepanjang 3 tahun yang lalu yang menghalang anda dari melakukan aktiviti biasa sekurang-kurangnya selama semingu?     (b) Adakah anda mempunyai kahak yang lebih daripada  biasa semasa menghidapi penyakit ini?    (c) Adakah anda menghidap lebih daripada satu penyakit  dada sepanjang 3 tahun yang lalu | 1  1 | 0  0 |

| **PENYAKIT TERDAHULU** | **YA** | **TIDAK** |
| --- | --- | --- |
| 1. Adakah anda pernah mengalami :   (a) Sebarang kecederaan atau pembedahan yang memberi  kesan pada dada?  (b) Masalah jantung?  (c) Bronkitis?  (d) Pleumonia?  (e) Pleurisi?  (f) Batuk kering (Tibi)?  (g) Asma (lelah)?  (h) Penyakit dada yang lain?  (I) Alergi (alahan)? | 1  1  1  1  1  1  1  1  1 | 0  0  0  0  0  0  0  0  0 |
| **SEJARAH MEROKOK** | **YA** | **TIDAK** |
| 1. Adakah anda merokok?   (sila rekodkan **YA**, jika anda merokok 1 batang sehari  untuk 6 bulan yang lalu)  Jika YA, nyatakan jumlah tahun merokok; _____tahun  Secara purata, berapakah jumlah batang anda hisap dalam  Sehari; _____ batang  Umur anda mula merokok; _____ tahun  Jika **TIDAK** pada **soalan 15**, teruskan ke soalan  Seterusnya   1. Jika anda tidak merokok sekarang, adakah anda pernah merokok satu masa dahulu? 2. Jika anda pernah merokok suatu masa dahulu, berapa lamakah anda telah berhenti merokok? _____ tahun | 1  1 | 0  0 |

| **SEJARAH PEKERJAAN** | **YA** | **Tempoh** | **TIDAK** |
| --- | --- | --- | --- |
| **Nyatakan jumlah tahun bekerja sekiranya anda pernah bekerja di sebarang tempat kerja** |  | **Tahun** |  |
| 1. Sebarang tempat kerja yang berdebu 2. Di lombong arang batu 3. Di mana- mana lombong 4. Dalam kuari 5. Dalam foundri 6. Dalam kilang pembuatan tembikar 7. Dalam kilang kapas, flak atau rami 8. Bekerja dengan asbestos 9. Adakah anda pernah kerap terdedah kepada gas merengsa dan wasap kimia?   Jika YA, sila nyatakan butir-butir sifat dan  Tempoh _____________________________ | 1  1  1  1  1  1  1  1  1 |  | 0  0  0  0  0  0  0  0  0 |
| **SESAK NAFAS** | **YA** |  | **TIDAK** |
| 1. Adakah anda mempunyai pekerjaan sambilan yang mendedahkan anda pada debu dan bahan kimia?   Jika **YA**, nyatakan;  ____________________________________   1. Adakah anda mempunyai hobi yang mendedahkan anda pada debu atau bahan kimia?   Jika **Ya,** nyatakan;  ____________________________________ | 1  1 |  | 0  0 |

**BAHAGIAN D: PEMATUHAN PERALATAN PERLINDUNGAN DIRI**

Sila pilih jawapan yang berikut untuk setiap soalan. Tandakan (/) pada jawapan yang betul

1. **Kadang-kadang**
2. **Kebanyakan waktu**
3. **Sepenuh masa**

Semasa melakukan kerja adakah anda memakai perlindungan peribadi seperti berikut:

**1**  **2 3**

1. Topi Keselamatan
2. Cermin mata/pelindung mata
3. Topeng
4. Palam telinga
5. Kasut keselamatan
6. Baju berlengan panjang
7. Sarung tangan

**BAHAGIAN E: AMALAN KERJA SELAMAT DI TEMPAT KERJA**

Sila pilih jawapan yang berikut untuk setiap soalan. Tandakan (/) pada jawapan yang betul

**0. Tidak Pernah**

**1. Kadang-kadang**

**2. Kebanyakan waktu**

**3. Sentiasa**

Semasa berada di tempat kerja/ melakukan kerja, adakah anda melakukan tabiat seperti:

**0 1 2 3**

1. Merokok
2. Membasuh tangan sebelum makan dan minum
3. Menukar pakaian setelah habis waktu bekerja
4. Mandi setelah tamat waktu bekerja sebelum pulang

Ke rumah
