# Supplementary figures and images for: Assessment of Fractional Exhaled Nitric Oxide and Lung Function Among Quarry Workers
Source: Research Square preprint supplement (doi:10.21203/rs.3.rs-7497811/v1), 2025-09-23

**Supplementary file 1**:


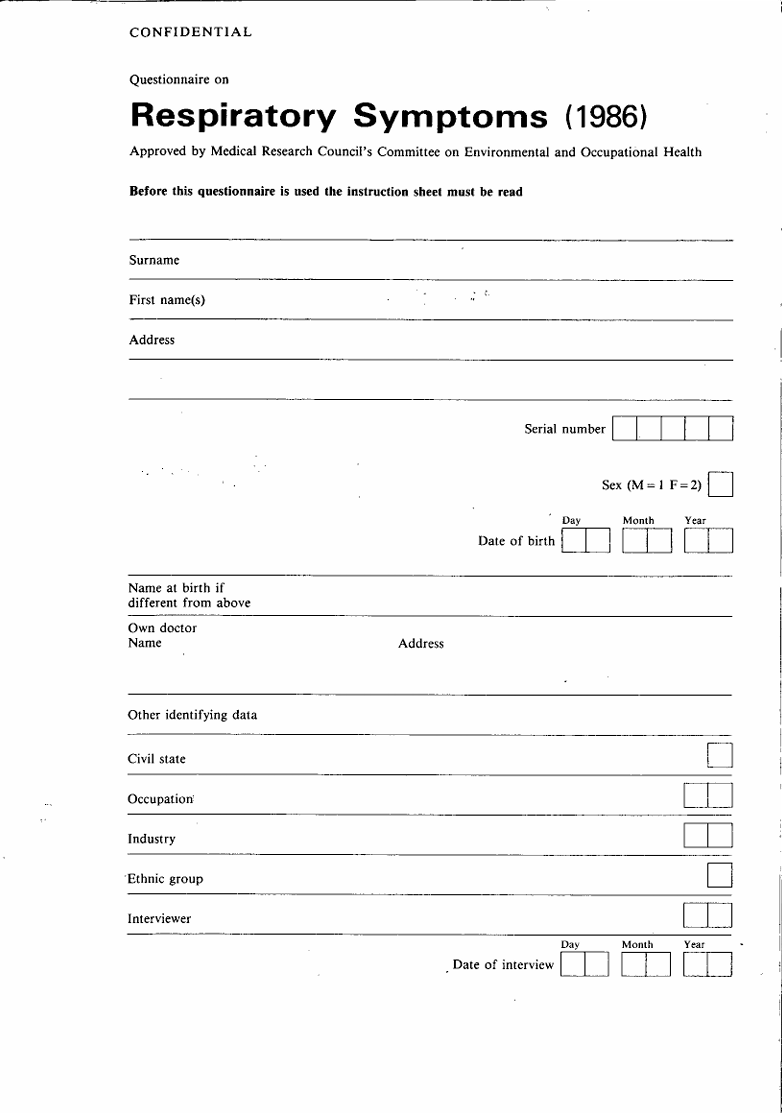


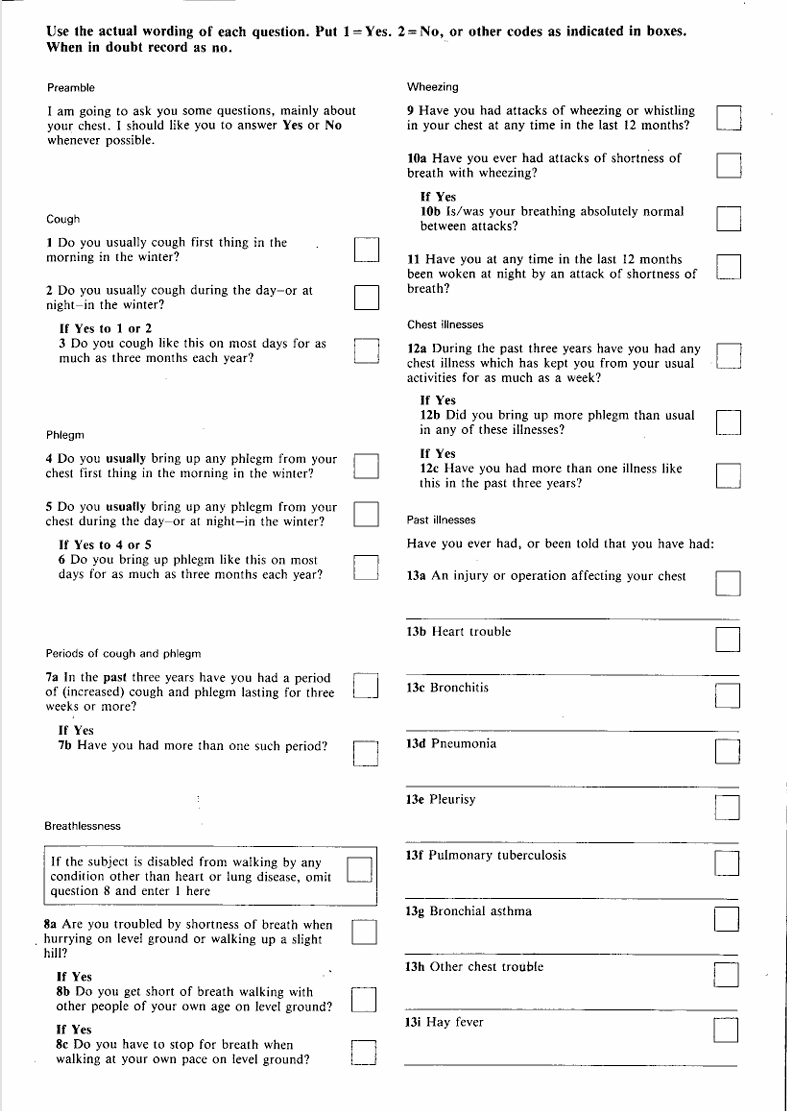


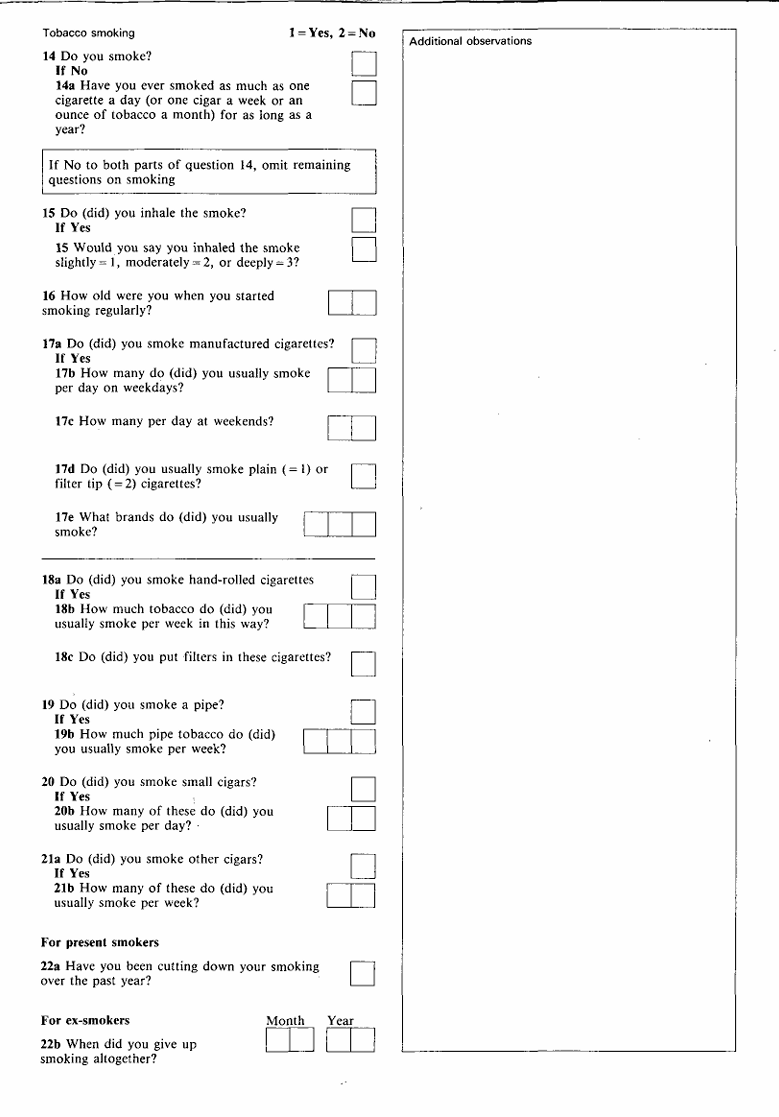


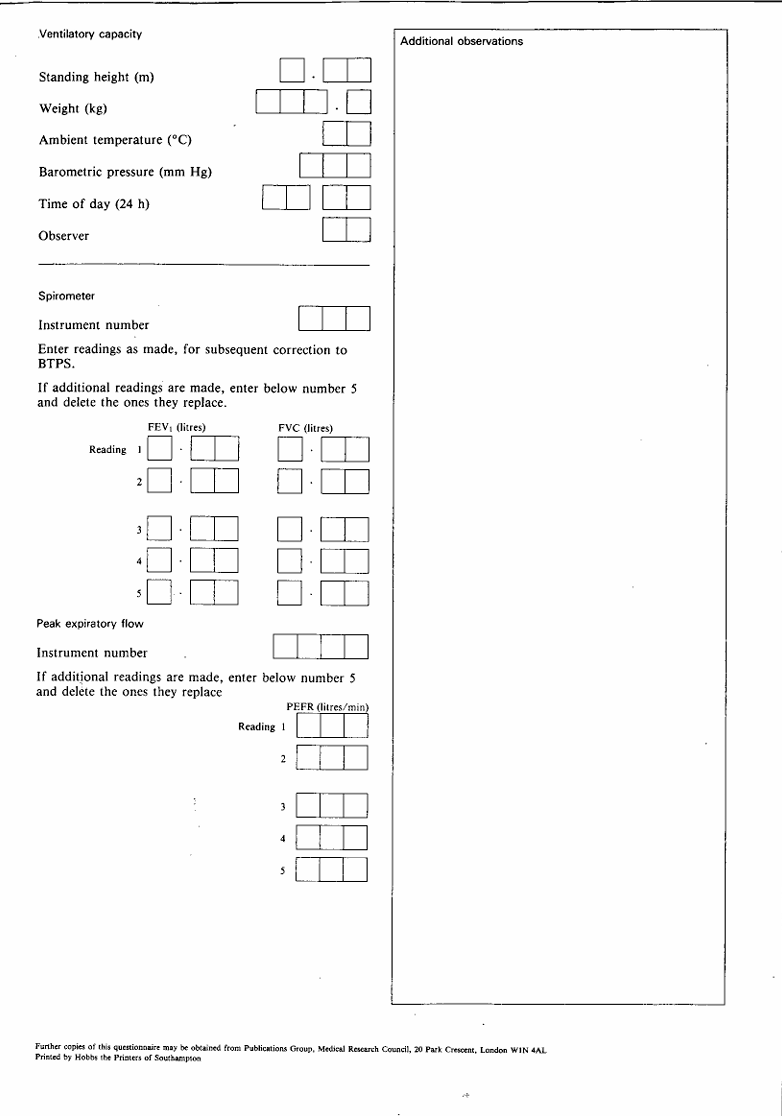

Supplement: Supplementary file 1 [file b0ab88745a7dfd9423e01c2e.docx]
